# Supplementary material for: Prediction of band inversion in Janus In2XYZ (X, Y, and Z = S, Se, Te) monolayers
Source: Royal Society of Chemistry journal article supplement (doi:10.1039/d4cp00932k), 2024-01-01
Supplement: d4cp00932k1.zip [file d4cp00932k1.zip]

## Supplementary Information

### Prediction of Band Inversion in Janus $\text{In}_2\text{XYZ}$ (X, Y, and Z= S, Se, Te) monolayers

Ashkan Rajabi-Maram<sup>1</sup>, Shoeib Babaee Touski<sup>2\*</sup>, Nona Hasani<sup>1</sup> and Majid Shalchian<sup>1</sup>

#### A Atomic structures

The lattice constant and atomic positions are reported in the format of quantum espresso. All values are in the unit of Å.

##### A.1 $\text{In}_2\text{X}_2\text{Y}$ monolayers

###### $\text{In}_2\text{SeSS}$

a= 7.520155727;

Atomic positions

|    |              |              |             |
|----|--------------|--------------|-------------|
| Se | -1.989758007 | -1.148787321 | 0.005849094 |
| In | 0.000000000  | 0.000000000  | 1.309281614 |
| S  | 0.000000000  | 0.000000000  | 3.725821555 |
| In | 1.989758007  | 1.148787321  | 5.333606796 |
| S  | -1.989758007 | -1.148787321 | 6.525440941 |

###### $\text{In}_2\text{SSeS}$

a= 7.484026347,

Atomic positions

|    |              |              |             |
|----|--------------|--------------|-------------|
| S  | -1.980198534 | -1.143268157 | 0.013543562 |
| In | -0.000000000 | -0.000000000 | 1.145732337 |
| Se | 0.000000000  | 0.000000000  | 3.691748632 |
| In | 1.980198534  | 1.143268157  | 5.421394376 |
| S  | -1.980198534 | -1.143268157 | 6.627581094 |

###### $\text{In}_2\text{SSSe}$

a= 7.523293957,

Atomic positions

|    |              |              |             |
|----|--------------|--------------|-------------|
| S  | -1.990588350 | -1.149266720 | 0.119505629 |
| In | -0.000000000 | -0.000000000 | 1.233415139 |
| S  | -0.000000000 | -0.000000000 | 3.656479593 |
| In | 1.990588350  | 1.149266720  | 5.261435620 |
| Se | -1.990588350 | -1.149266720 | 6.629164019 |

###### $\text{In}_2\text{SSeSe}$

a= 7.591012008,

|    |              |              |             |
|----|--------------|--------------|-------------|
| S  | -2.008505870 | -1.159611405 | 0.009199481 |
| In | -0.000000000 | -0.000000000 | 1.113641546 |
| Se | -0.000000000 | -0.000000000 | 3.664458209 |
| In | 2.008505870  | 1.159611405  | 5.374211111 |
| Se | -2.008505870 | -1.159611405 | 6.738489652 |

###### $\text{In}_2\text{SeSSe}$

a= 7.630499662,

|    |              |              |             |
|----|--------------|--------------|-------------|
| Se | -2.018953909 | -1.165643583 | 0.002065167 |
| In | 0.000000000  | 0.000000000  | 1.278487771 |
| S  | 0.000000000  | 0.000000000  | 3.701963004 |
| In | 2.018953909  | 1.165643583  | 5.287361240 |
| Se | -2.018953909 | -1.165643583 | 6.630122818 |

<sup>01</sup>Department of Electrical Engineering, Amirkabir University of Technology, Tehran, Iran

<sup>02</sup> Department of Electrical Engineering, Hamedan University of Technology, Hamedan, Iran; E-mail: touski@hut.ac.ir

**In<sub>2</sub>SeSSeS**

a= 7.586740258,

|    |              |              |              |
|----|--------------|--------------|--------------|
| Se | -2.007375608 | -1.158958848 | -0.104791048 |
| In | 0.000000000  | 0.000000000  | 1.189981601  |
| Se | -0.000000000 | -0.000000000 | 3.735485796  |
| In | 2.007375608  | 1.158958848  | 5.447096077  |
| S  | -2.007375608 | -1.158958848 | 6.632227574  |

**In<sub>2</sub>TeSS**

a= 7.74227109,

Atomic positions

|    |              |              |              |
|----|--------------|--------------|--------------|
| Te | -2.048527511 | -1.182717910 | -0.137259107 |
| In | -0.000000000 | -0.000000000 | 1.375346197  |
| S  | 0.000000000  | 0.000000000  | 3.794965434  |
| In | 2.048527511  | 1.182717910  | 5.362833033  |
| S  | -2.048527511 | -1.182717910 | 6.504114443  |

**In<sub>2</sub>STeS**

a= 7.642249801,

Atomic positions

|    |              |              |              |
|----|--------------|--------------|--------------|
| S  | -2.022062878 | -1.167438548 | -0.155789023 |
| In | 0.000000000  | 0.000000000  | 0.918216570  |
| Te | 0.000000000  | 0.000000000  | 3.687952461  |
| In | 2.022062878  | 1.167438548  | 5.639599021  |
| S  | -2.022062878 | -1.167438548 | 6.810020970  |

**In<sub>2</sub>SSTe**

a= 7.727642128,

Atomic positions

|    |              |              |             |
|----|--------------|--------------|-------------|
| S  | -2.044656833 | -1.180483173 | 0.148738869 |
| In | -0.000000000 | -0.000000000 | 1.174557193 |
| S  | 0.000000000  | 0.000000000  | 3.625229077 |
| In | 2.044656833  | 1.180483173  | 5.161747879 |
| Te | -2.044656833 | -1.180483173 | 6.789726982 |

**In<sub>2</sub>STeTe**

a= 7.945985397,

Atomic positions

|    |              |              |              |
|----|--------------|--------------|--------------|
| S  | -2.102428278 | -1.213837533 | -0.125463320 |
| In | -0.000000000 | -0.000000000 | 0.844302810  |
| Te | -0.000000000 | -0.000000000 | 3.637989011  |
| In | 2.102428278  | 1.213837533  | 5.483155495  |
| Te | -2.102428278 | -1.213837533 | 7.060016004  |

**In<sub>2</sub>TeSTe**

a= 8.082346043,

Atomic positions

|    |              |              |              |
|----|--------------|--------------|--------------|
| Te | -2.138507943 | -1.234668137 | -0.117741660 |
| In | -0.000000000 | -0.000000000 | 1.294929195  |
| S  | 0.000000000  | 0.000000000  | 3.723267299  |
| In | 2.138507943  | 1.234668137  | 5.247133532  |
| Te | -2.138507943 | -1.234668137 | 6.752411635  |

**In<sub>2</sub>TeTeS**

a= 7.928635543,

Atomic positions

|    |              |              |              |
|----|--------------|--------------|--------------|
| Te | -2.103183230 | -1.214273404 | -0.411123999 |
| In | 0.000000000  | 0.000000000  | 1.053130703  |
| Te | 0.000000000  | 0.000000000  | 3.802400270  |
| In | 2.103183230  | 1.214273404  | 5.667243236  |
| S  | -2.103183230 | -1.214273404 | 6.788349789  |

**In<sub>2</sub>TeSeSe**

a= 7.948838682,

Atomic positions

|    |              |              |              |
|----|--------------|--------------|--------------|
| Te | -2.097837680 | -1.211187150 | -0.240597961 |
| In | 0.000000000  | 0.000000000  | 1.223220039  |
| Se | 0.000000000  | 0.000000000  | 3.776692787  |
| In | 2.097837680  | 1.211187150  | 5.426461190  |

Se -2.097837680 -1.211187150 6.714223944  
**In<sub>2</sub>SeTeSe**  
a = 7.852551126,  
Atomic positions  
Se -2.077706505 -1.199564410 -0.268267930  
In 0.000000000 0.000000000 0.953433096  
Te -0.000000000 -0.000000000 3.713511340  
In 2.077706505 1.199564410 5.593404952  
Se -2.077706505 -1.199564410 6.907918543  
**In<sub>2</sub>SeSeTe**  
a = 7.919389422,  
Atomic positions  
Se -2.095391250 -1.209774703 -0.079185615  
In 0.000000000 0.000000000 1.111041747  
Se -0.000000000 -0.000000000 3.673566542  
In 2.095391250 1.209774703 5.318145833  
Te -2.095391250 -1.209774703 6.876431492  
**In<sub>2</sub>SeTeTe**  
a = 8.061860553,  
Atomic positions  
Se -2.133087687 -1.231538751 -0.251888567  
In 0.000000000 0.000000000 0.907910937  
Te 0.000000000 0.000000000 3.683572576  
In 2.133087687 1.231538751 5.512998778  
Te -2.133087687 -1.231538751 7.047406276  
**In<sub>2</sub>TeSeTe**  
a = 8.14148823,  
Atomic positions  
Te -2.154156373 -1.243702762 -0.228278049  
In -0.000000000 -0.000000000 1.178722587  
Se -0.000000000 -0.000000000 3.740285065  
In 2.154156373 1.243702762 5.356175779  
Te -2.154156373 -1.243702762 6.853094617  
**In<sub>2</sub>TeTeSe**  
a = 8.064904127,  
Atomic positions  
Te -2.133892985 -1.232003690 -0.410085597  
In -0.000000000 -0.000000000 1.023043035  
Te 0.000000000 0.000000000 3.779607712  
In 2.133892985 1.232003690 5.615232246  
Se -2.133892985 -1.232003690 6.892202604

---

## B In<sub>2</sub>XYZ monolayers

**In<sub>2</sub>SSeTe**  
a = 7.793275669,  
Atomic positions  
S -2.062022811 -1.190509426 0.036089941  
In 0.000000000 0.000000000 1.052170076  
Se -0.000000000 -0.000000000 3.634282433  
In 2.062022811 1.190509426 5.280127453  
Te -2.062022811 -1.190509426 6.897330097  
**In<sub>2</sub>STeSe**  
a = 7.747239103,  
Atomic positions  
S -2.049841996 -1.183476829 -0.151943499  
In 0.000000000 0.000000000 0.891247912  
Te -0.000000000 -0.000000000 3.664756325  
In 2.049841996 1.183476829 5.582957685  
Se -2.049841996 -1.183476829 6.912981577  
**In<sub>2</sub>SeSTe**  
a = 7.850112639,

Atomic positions

|    |              |              |             |
|----|--------------|--------------|-------------|
| Se | -2.077061306 | -1.199191905 | 0.022971081 |
| In | -0.000000000 | -0.000000000 | 1.230796137 |
| S  | -0.000000000 | -0.000000000 | 3.663412473 |
| In | 2.077061306  | 1.199191905  | 5.206965848 |
| Te | -2.077061306 | -1.199191905 | 6.775854461 |

**In<sub>2</sub>SeTeS**

a= 7.74229853,

Atomic positions

|    |              |              |              |
|----|--------------|--------------|--------------|
| Se | -2.048534771 | -1.182722102 | -0.268125564 |
| In | -0.000000000 | -0.000000000 | 0.981128277  |
| Te | 0.000000000  | 0.000000000  | 3.732719277  |
| In | 2.048534771  | 1.182722102  | 5.649174116  |
| S  | -2.048534771 | -1.182722102 | 6.805103894  |

**In<sub>2</sub>TeSSe**

a= 7.858468305,

Atomic positions

|    |              |              |              |
|----|--------------|--------------|--------------|
| Te | -2.079272132 | -1.200468325 | -0.136345653 |
| In | 0.000000000  | 0.000000000  | 1.343525312  |
| S  | 0.000000000  | 0.000000000  | 3.767366430  |
| In | 2.079272132  | 1.200468325  | 5.315421524  |
| Se | -2.079272132 | -1.200468325 | 6.610032388  |

**In<sub>2</sub>TeSeS**

a= 7.800944817,

Atomic positions

|    |              |              |              |
|----|--------------|--------------|--------------|
| Te | -2.064051992 | -1.191680974 | -0.249317497 |
| In | 0.000000000  | 0.000000000  | 1.252955346  |
| Se | 0.000000000  | 0.000000000  | 3.802393226  |
| In | 2.064051992  | 1.191680974  | 5.475560905  |
| S  | -2.064051992 | -1.191680974 | 6.618408020  |

---
