# Supplementary figures and images for: Prediction of band inversion in Janus In2XYZ (X, Y, and Z = S, Se, Te) monolayers
Source: Royal Society of Chemistry journal article supplement (doi:10.1039/d4cp00932k), 2024-01-01

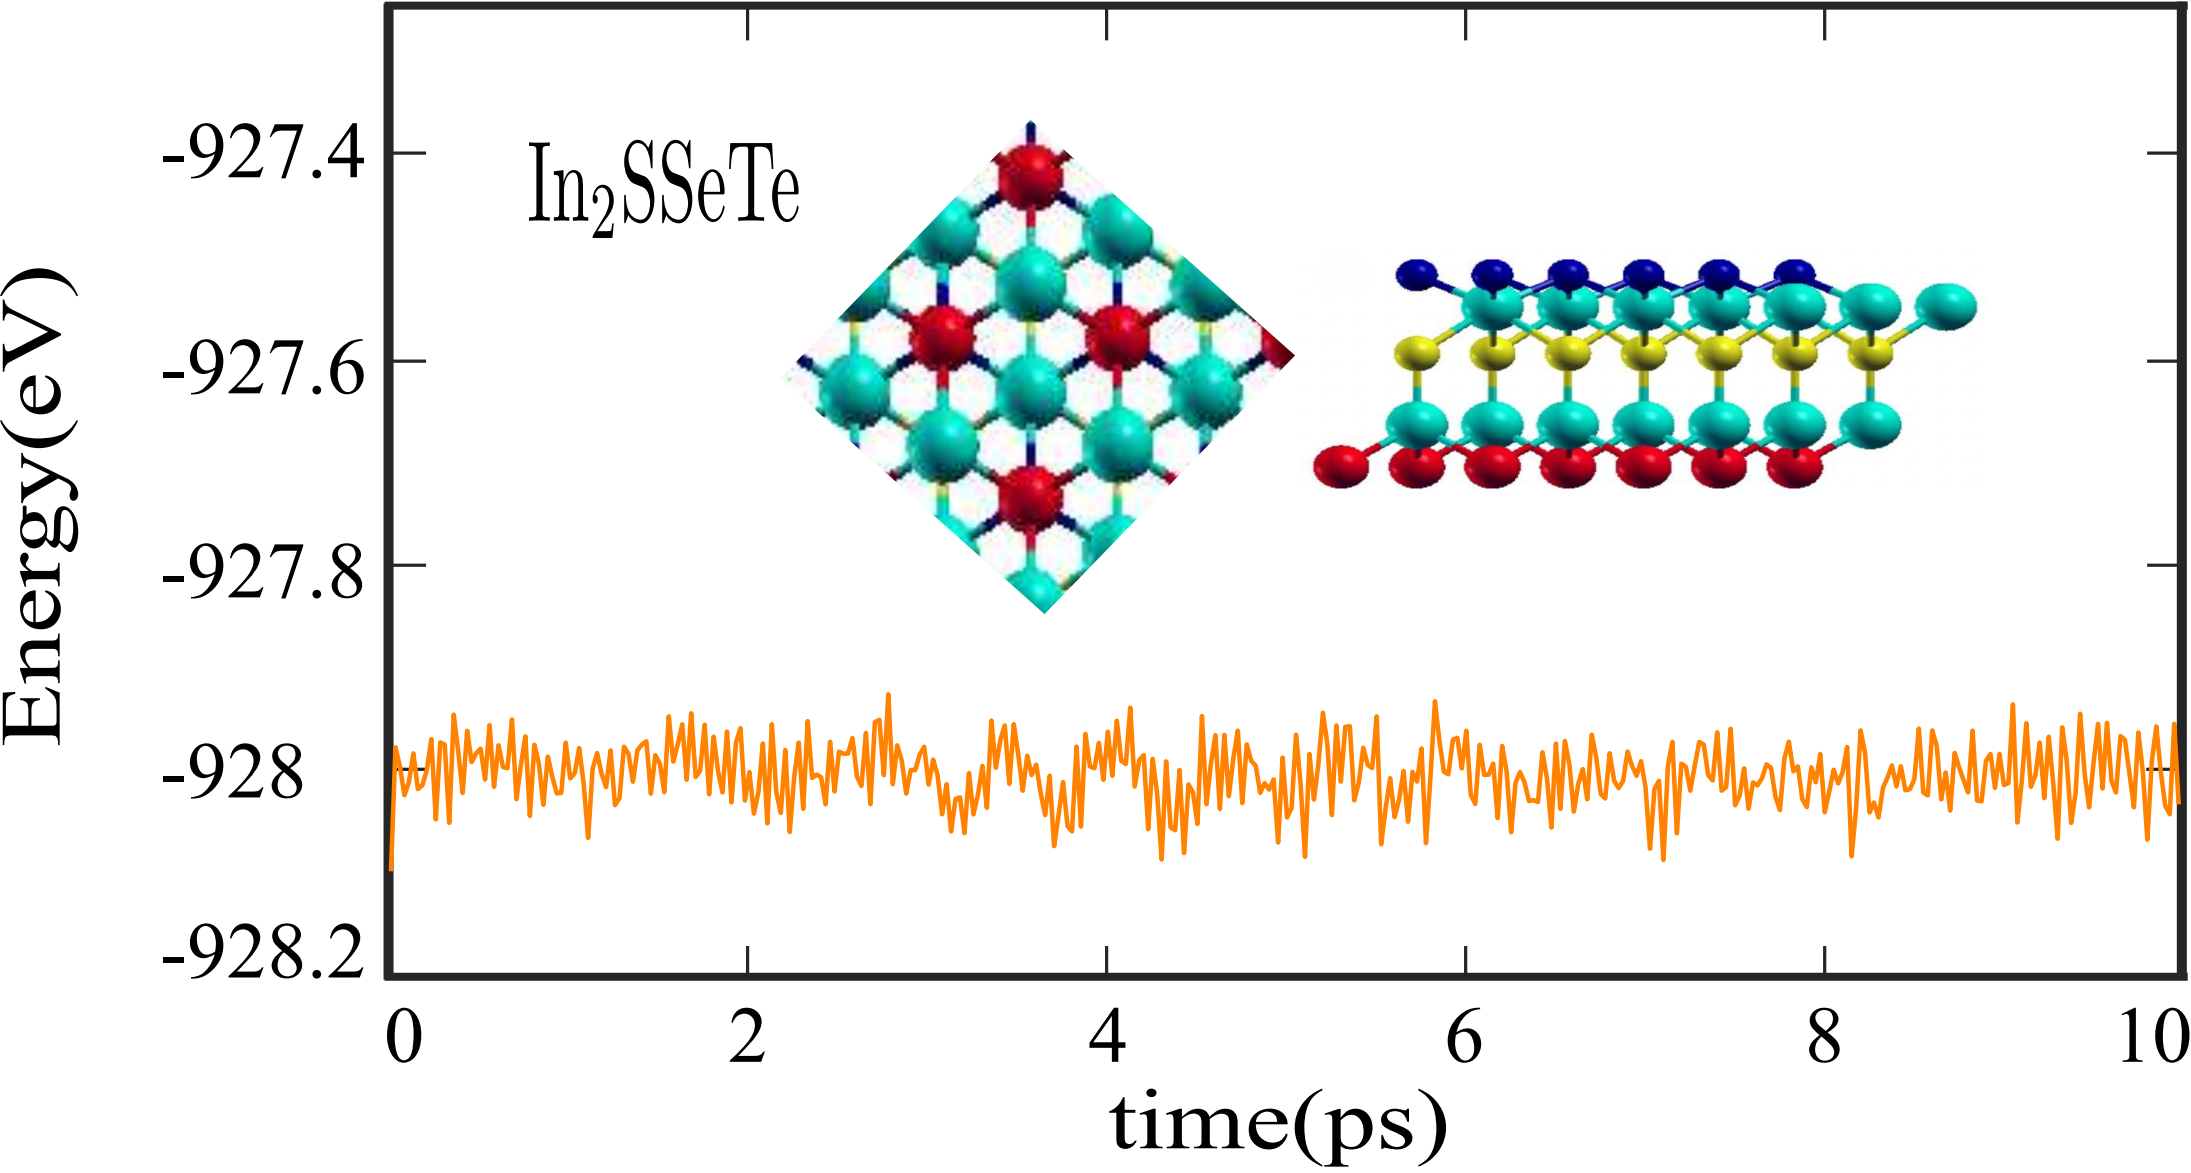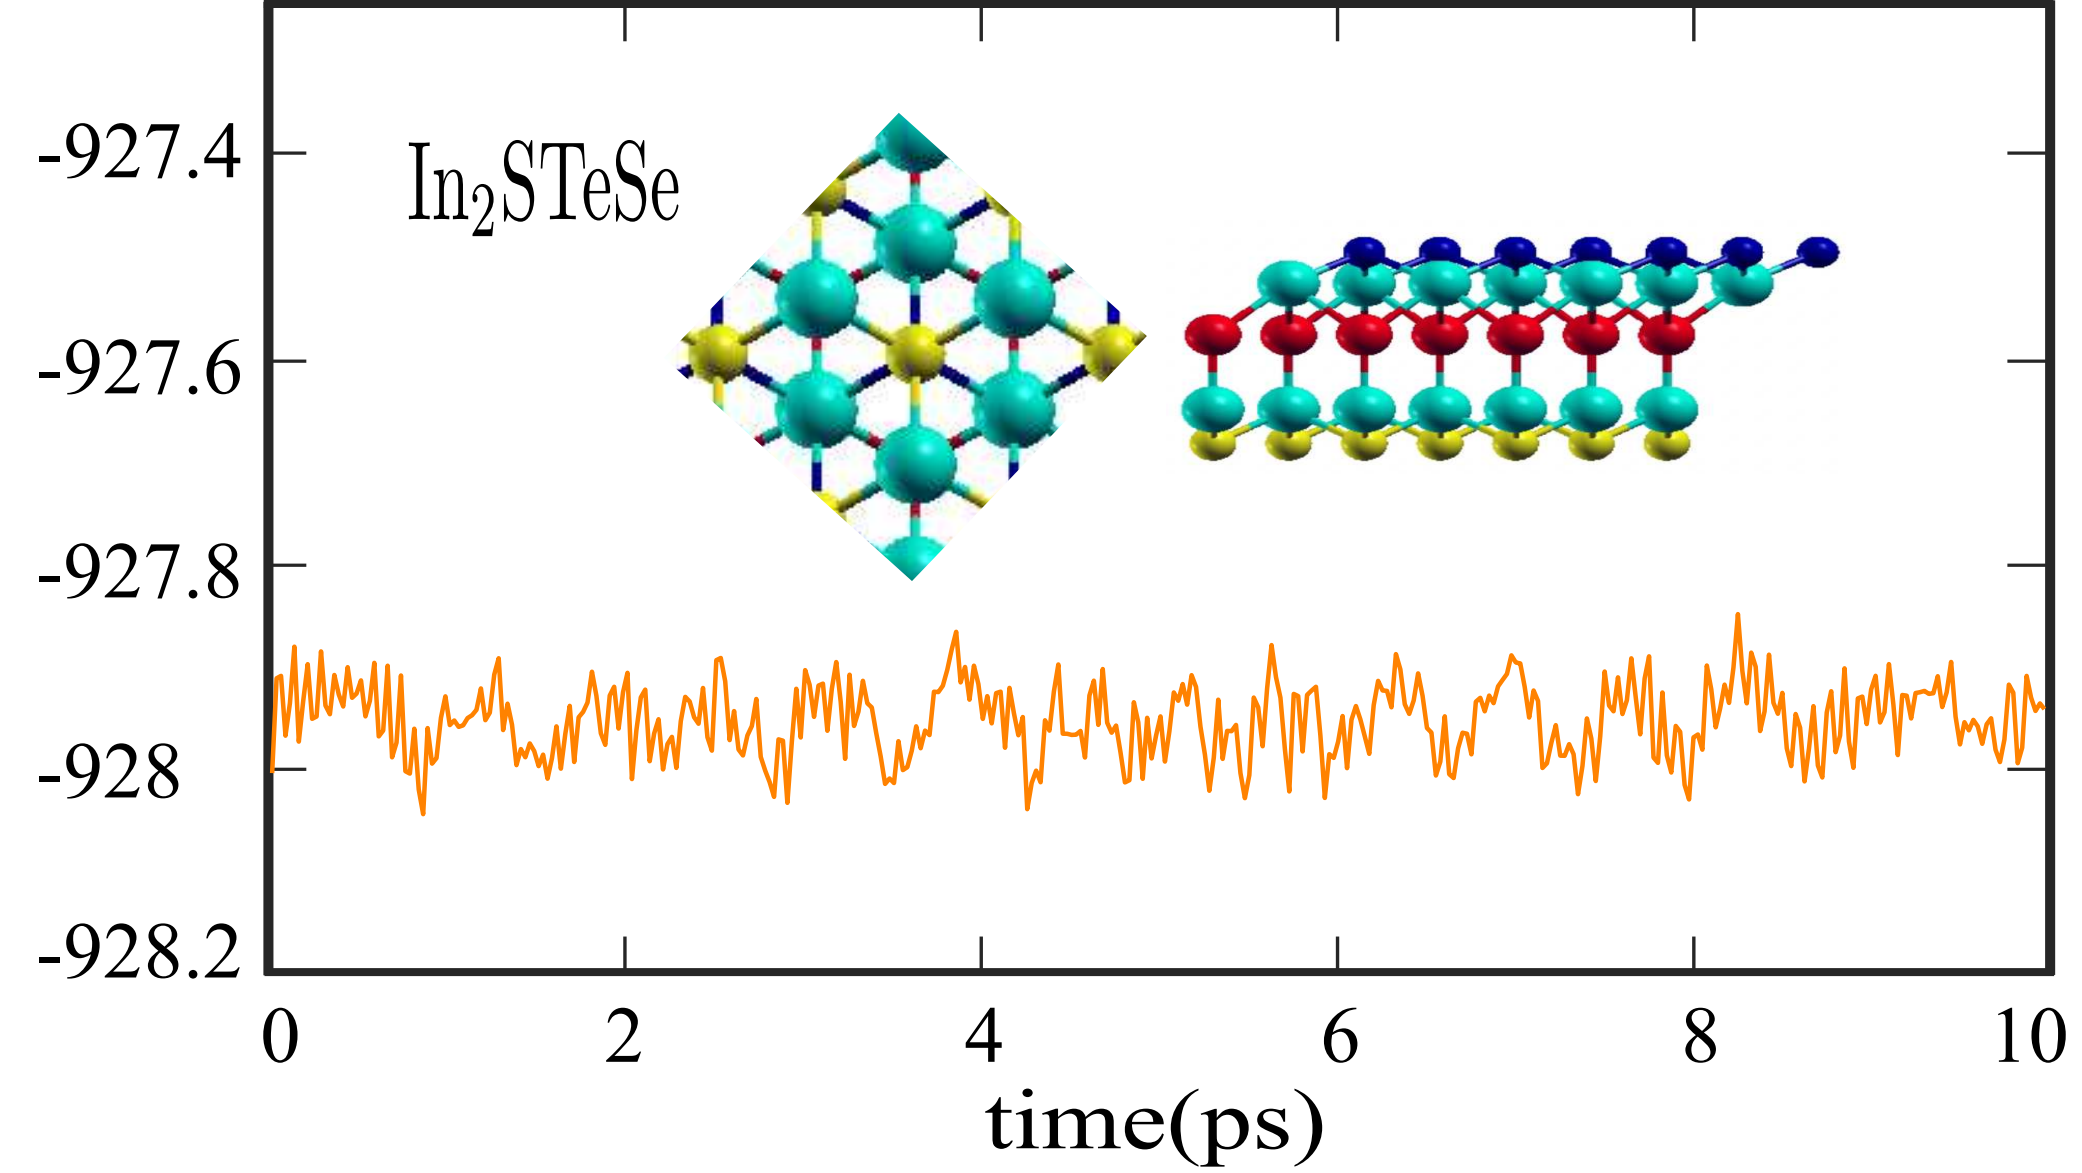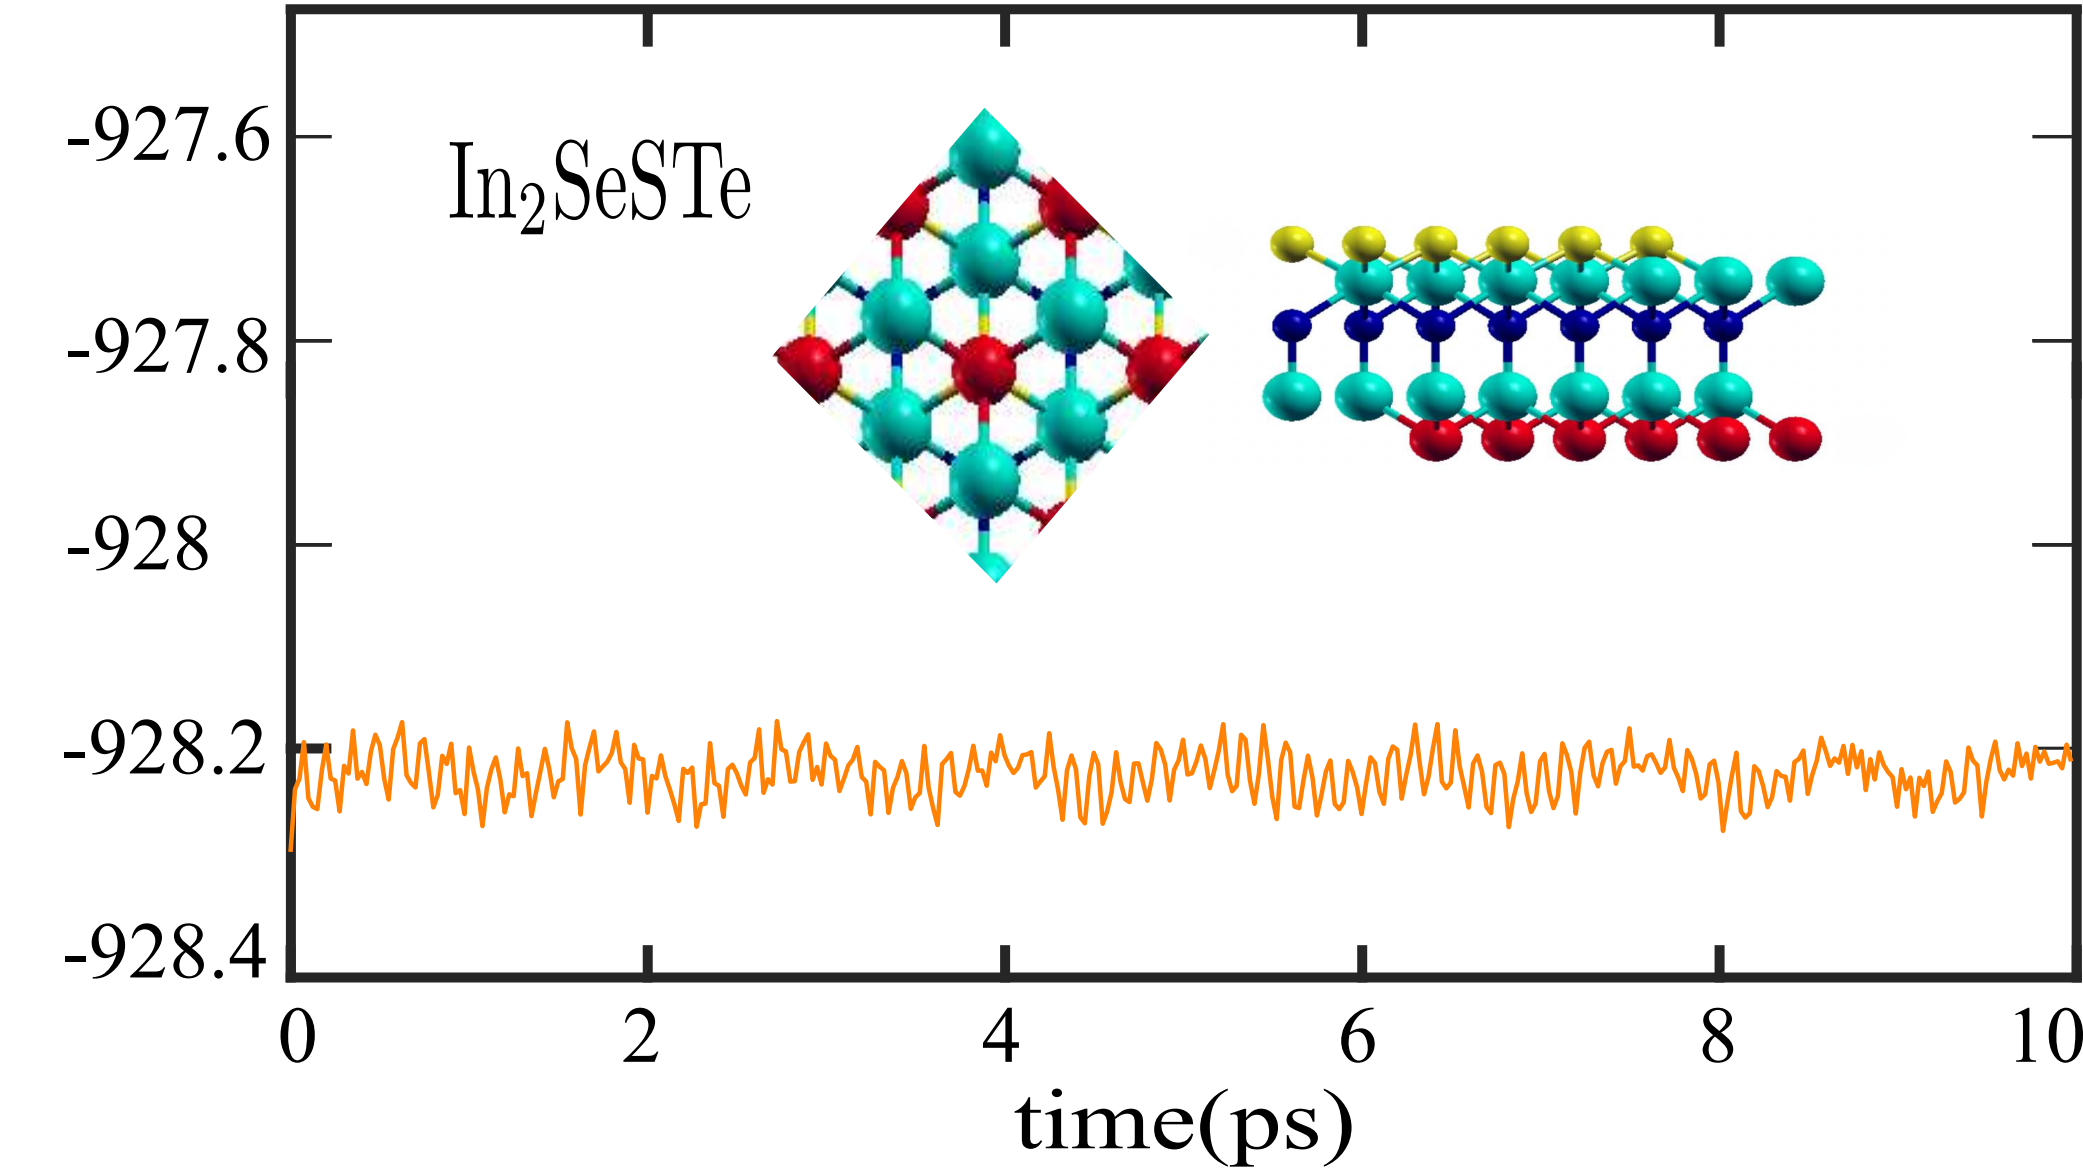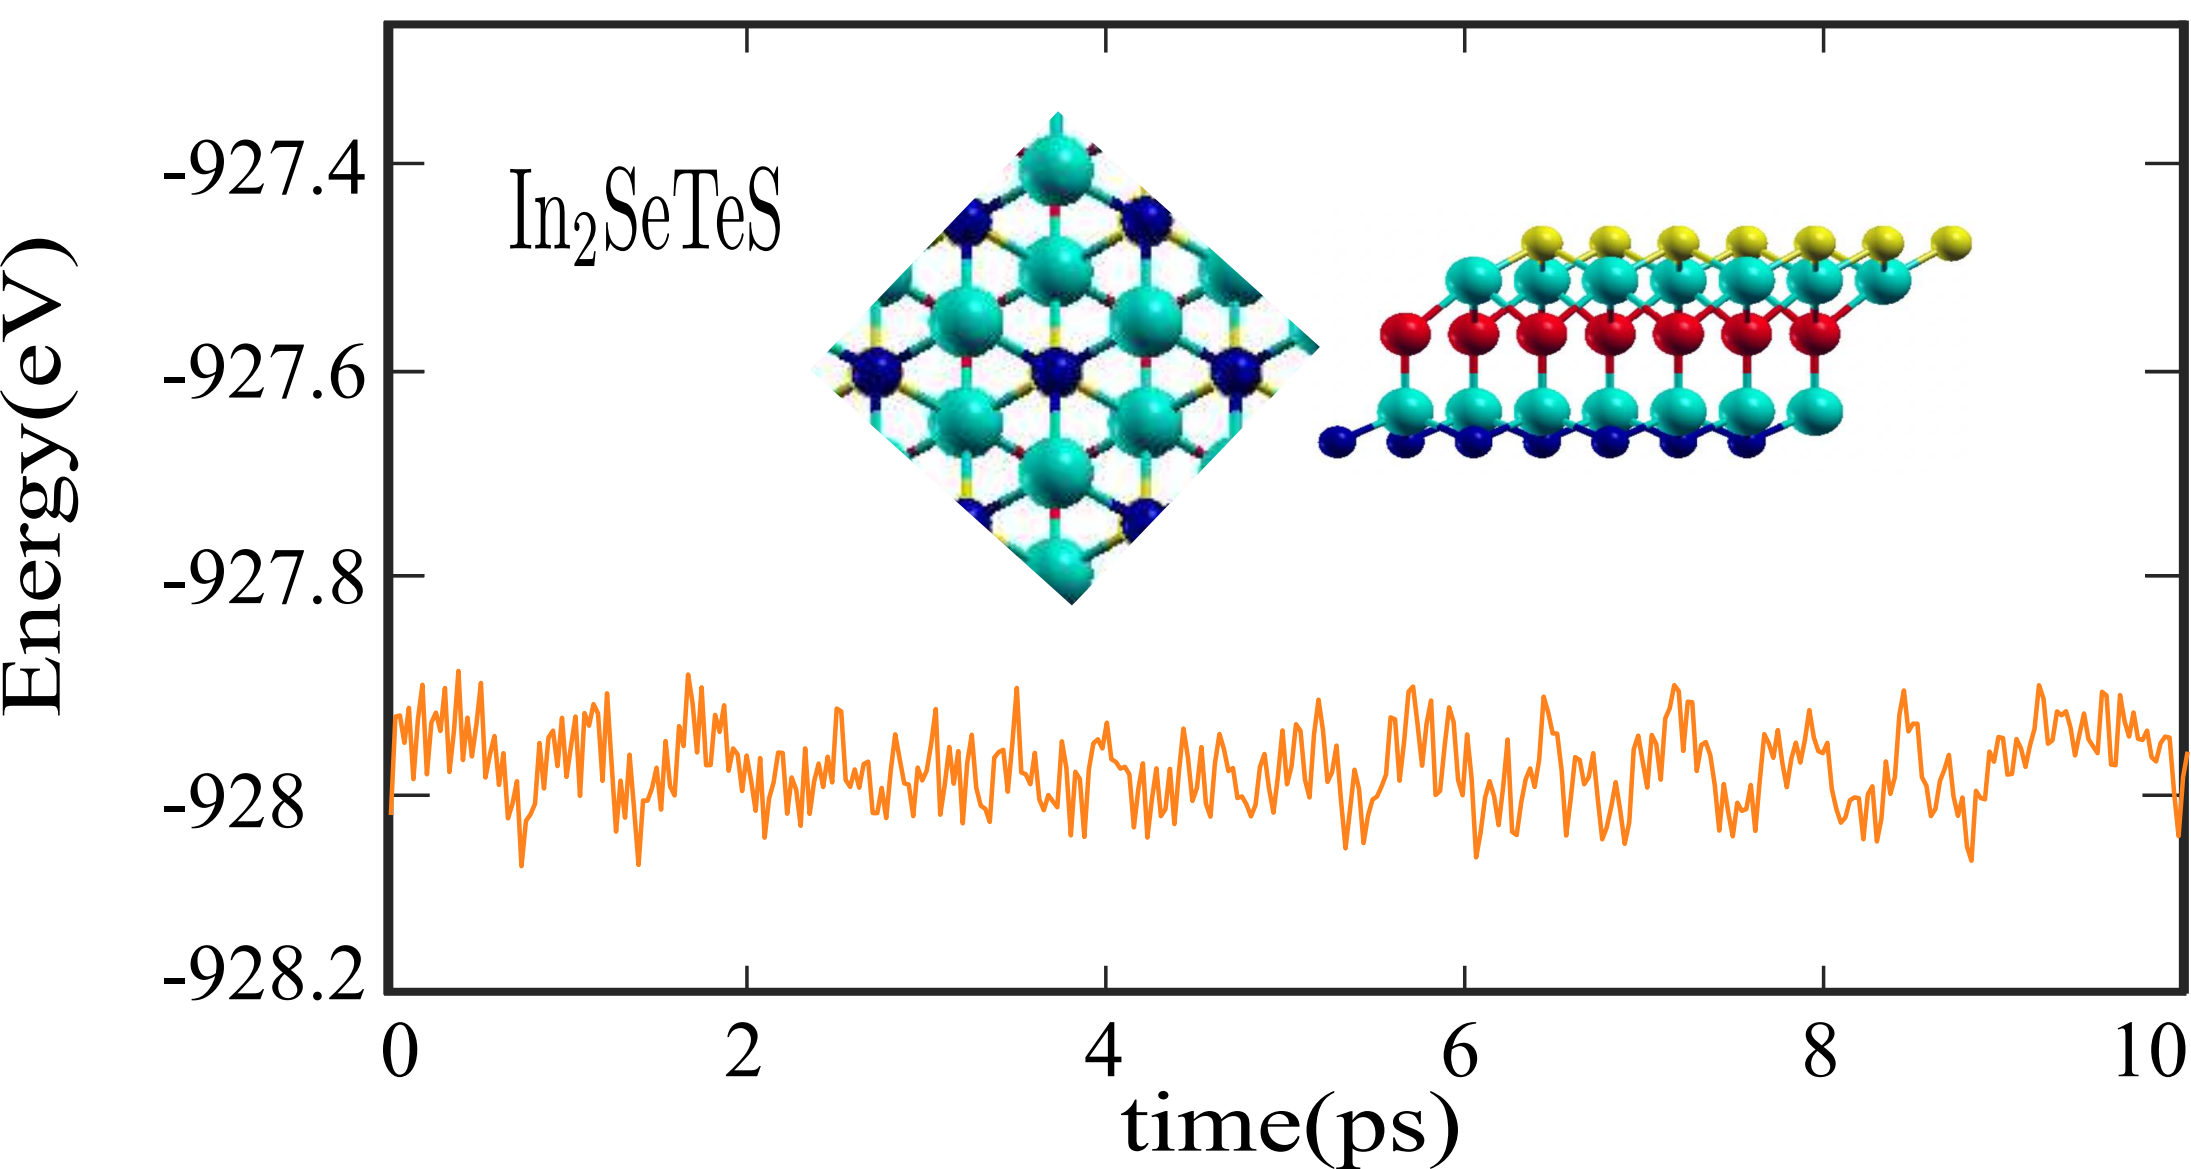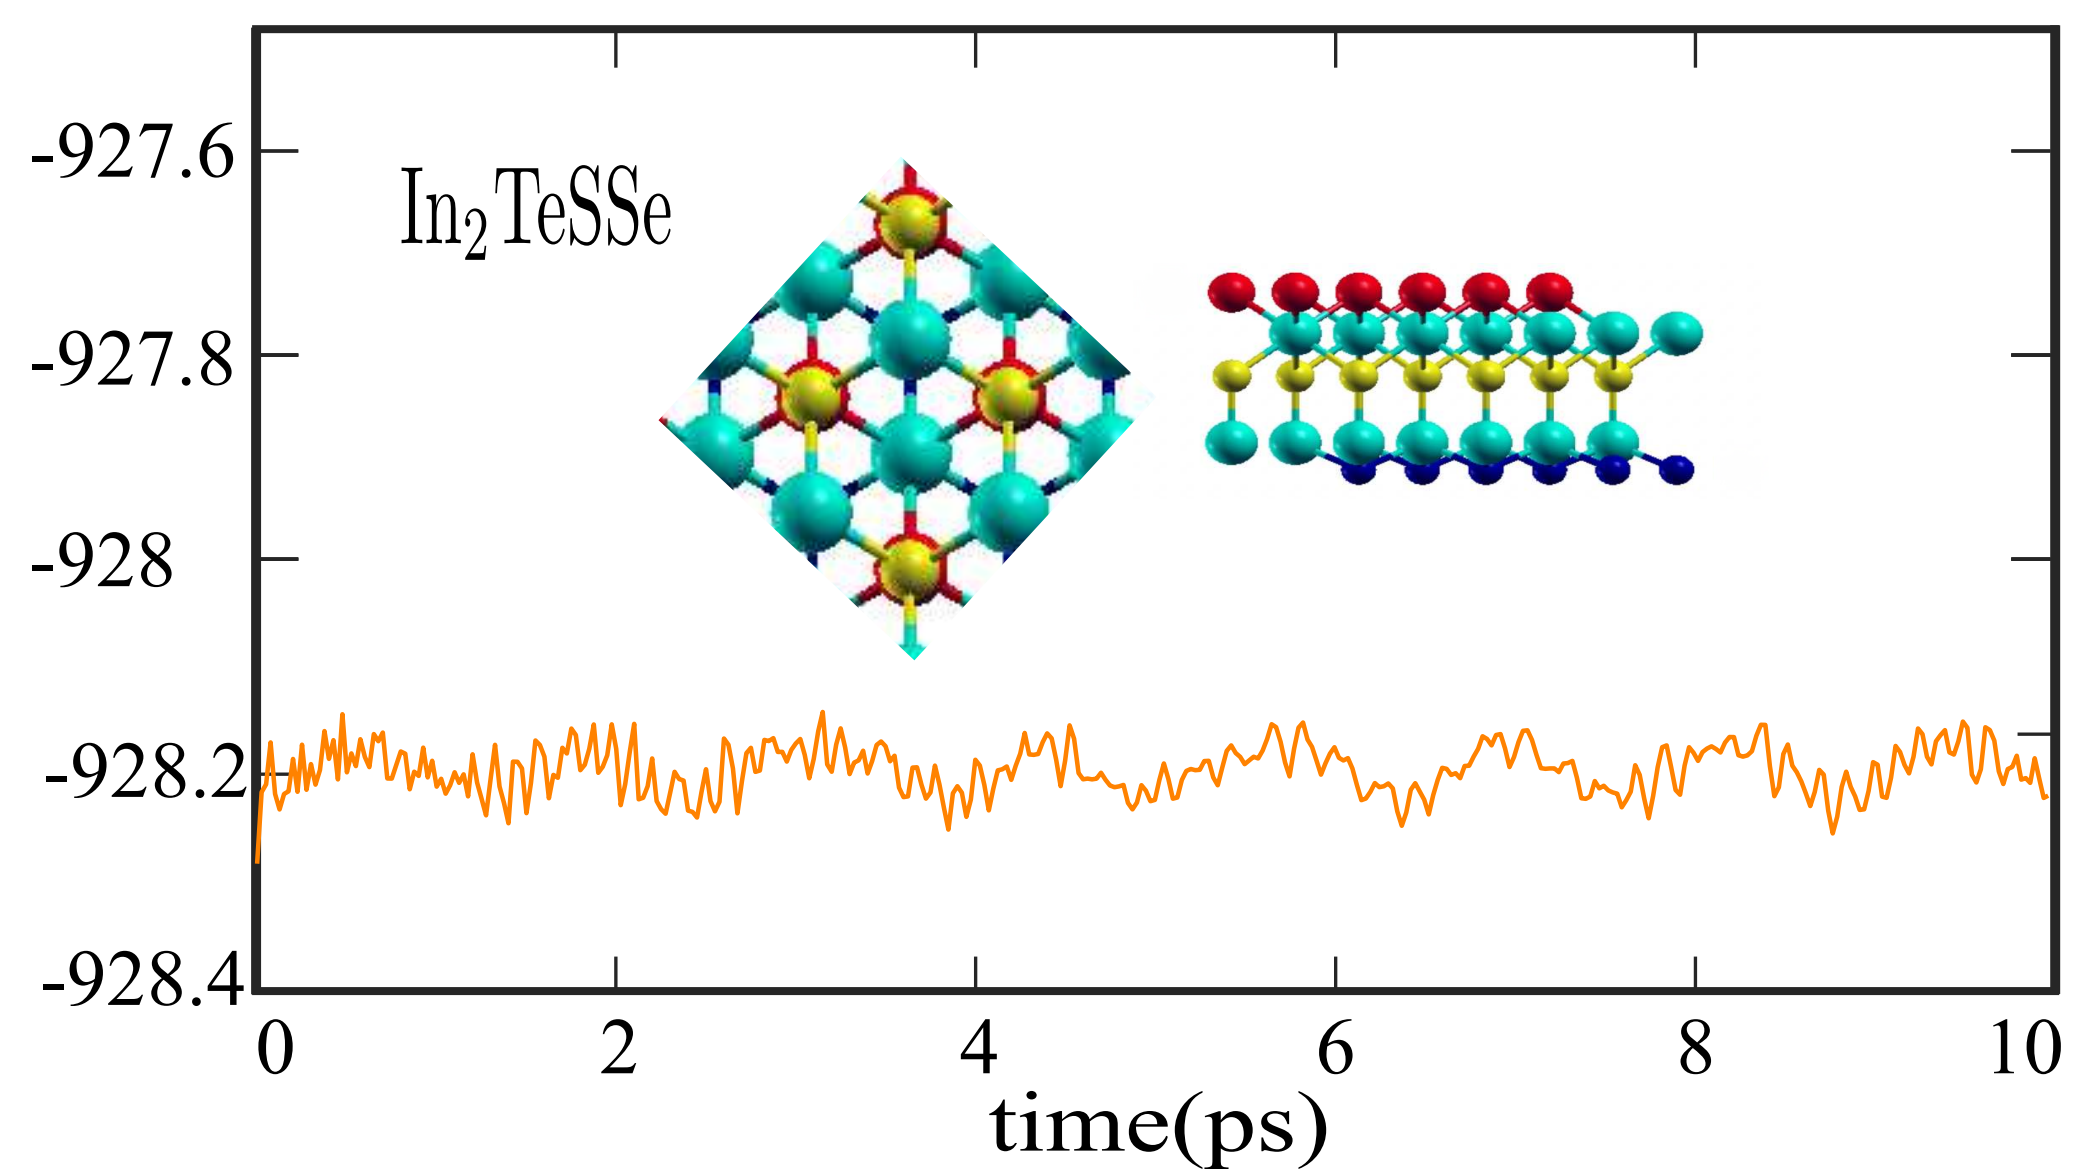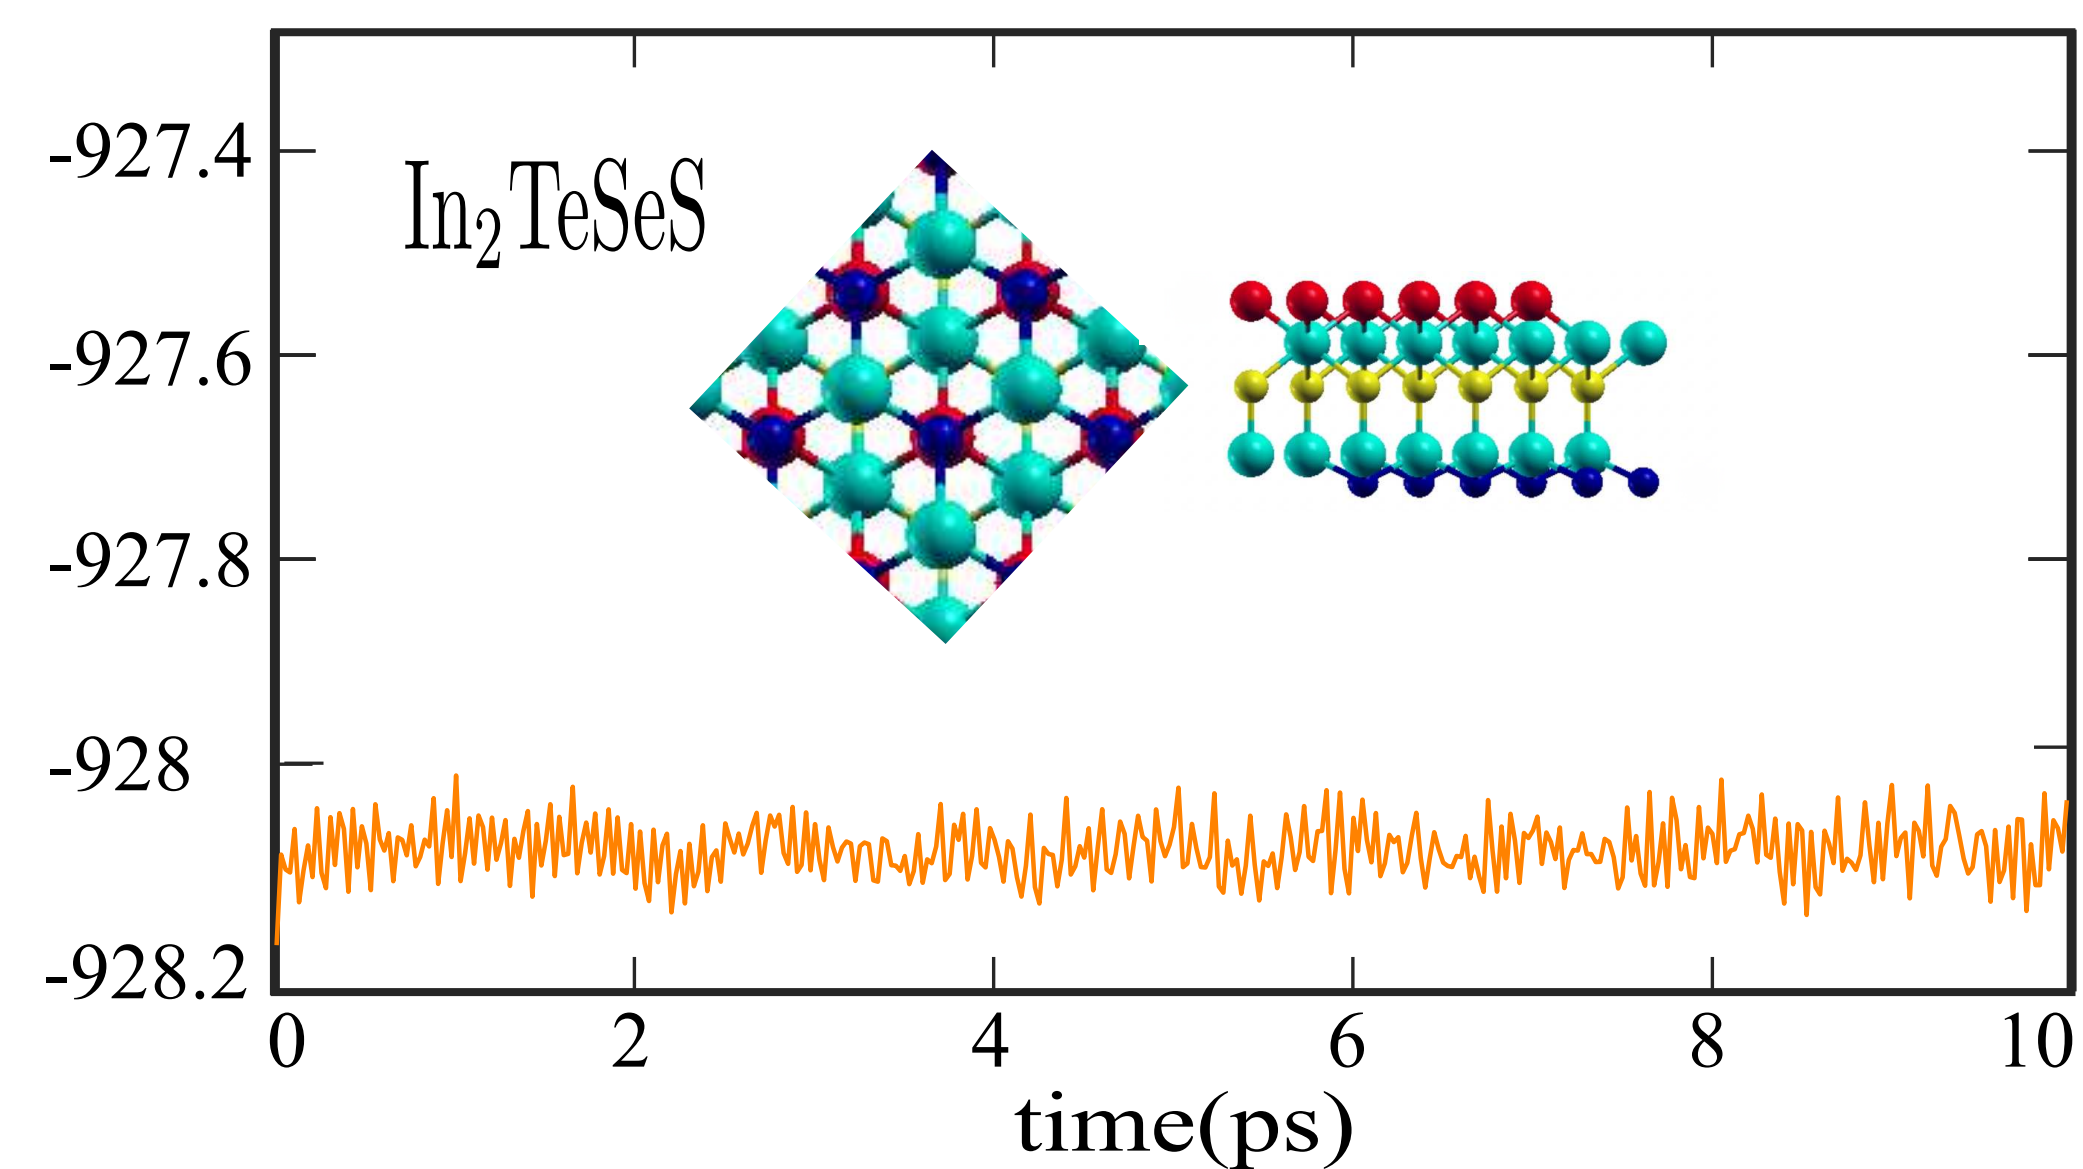

Supplement: d4cp00932k2.zip [file d4cp00932k2.zip]

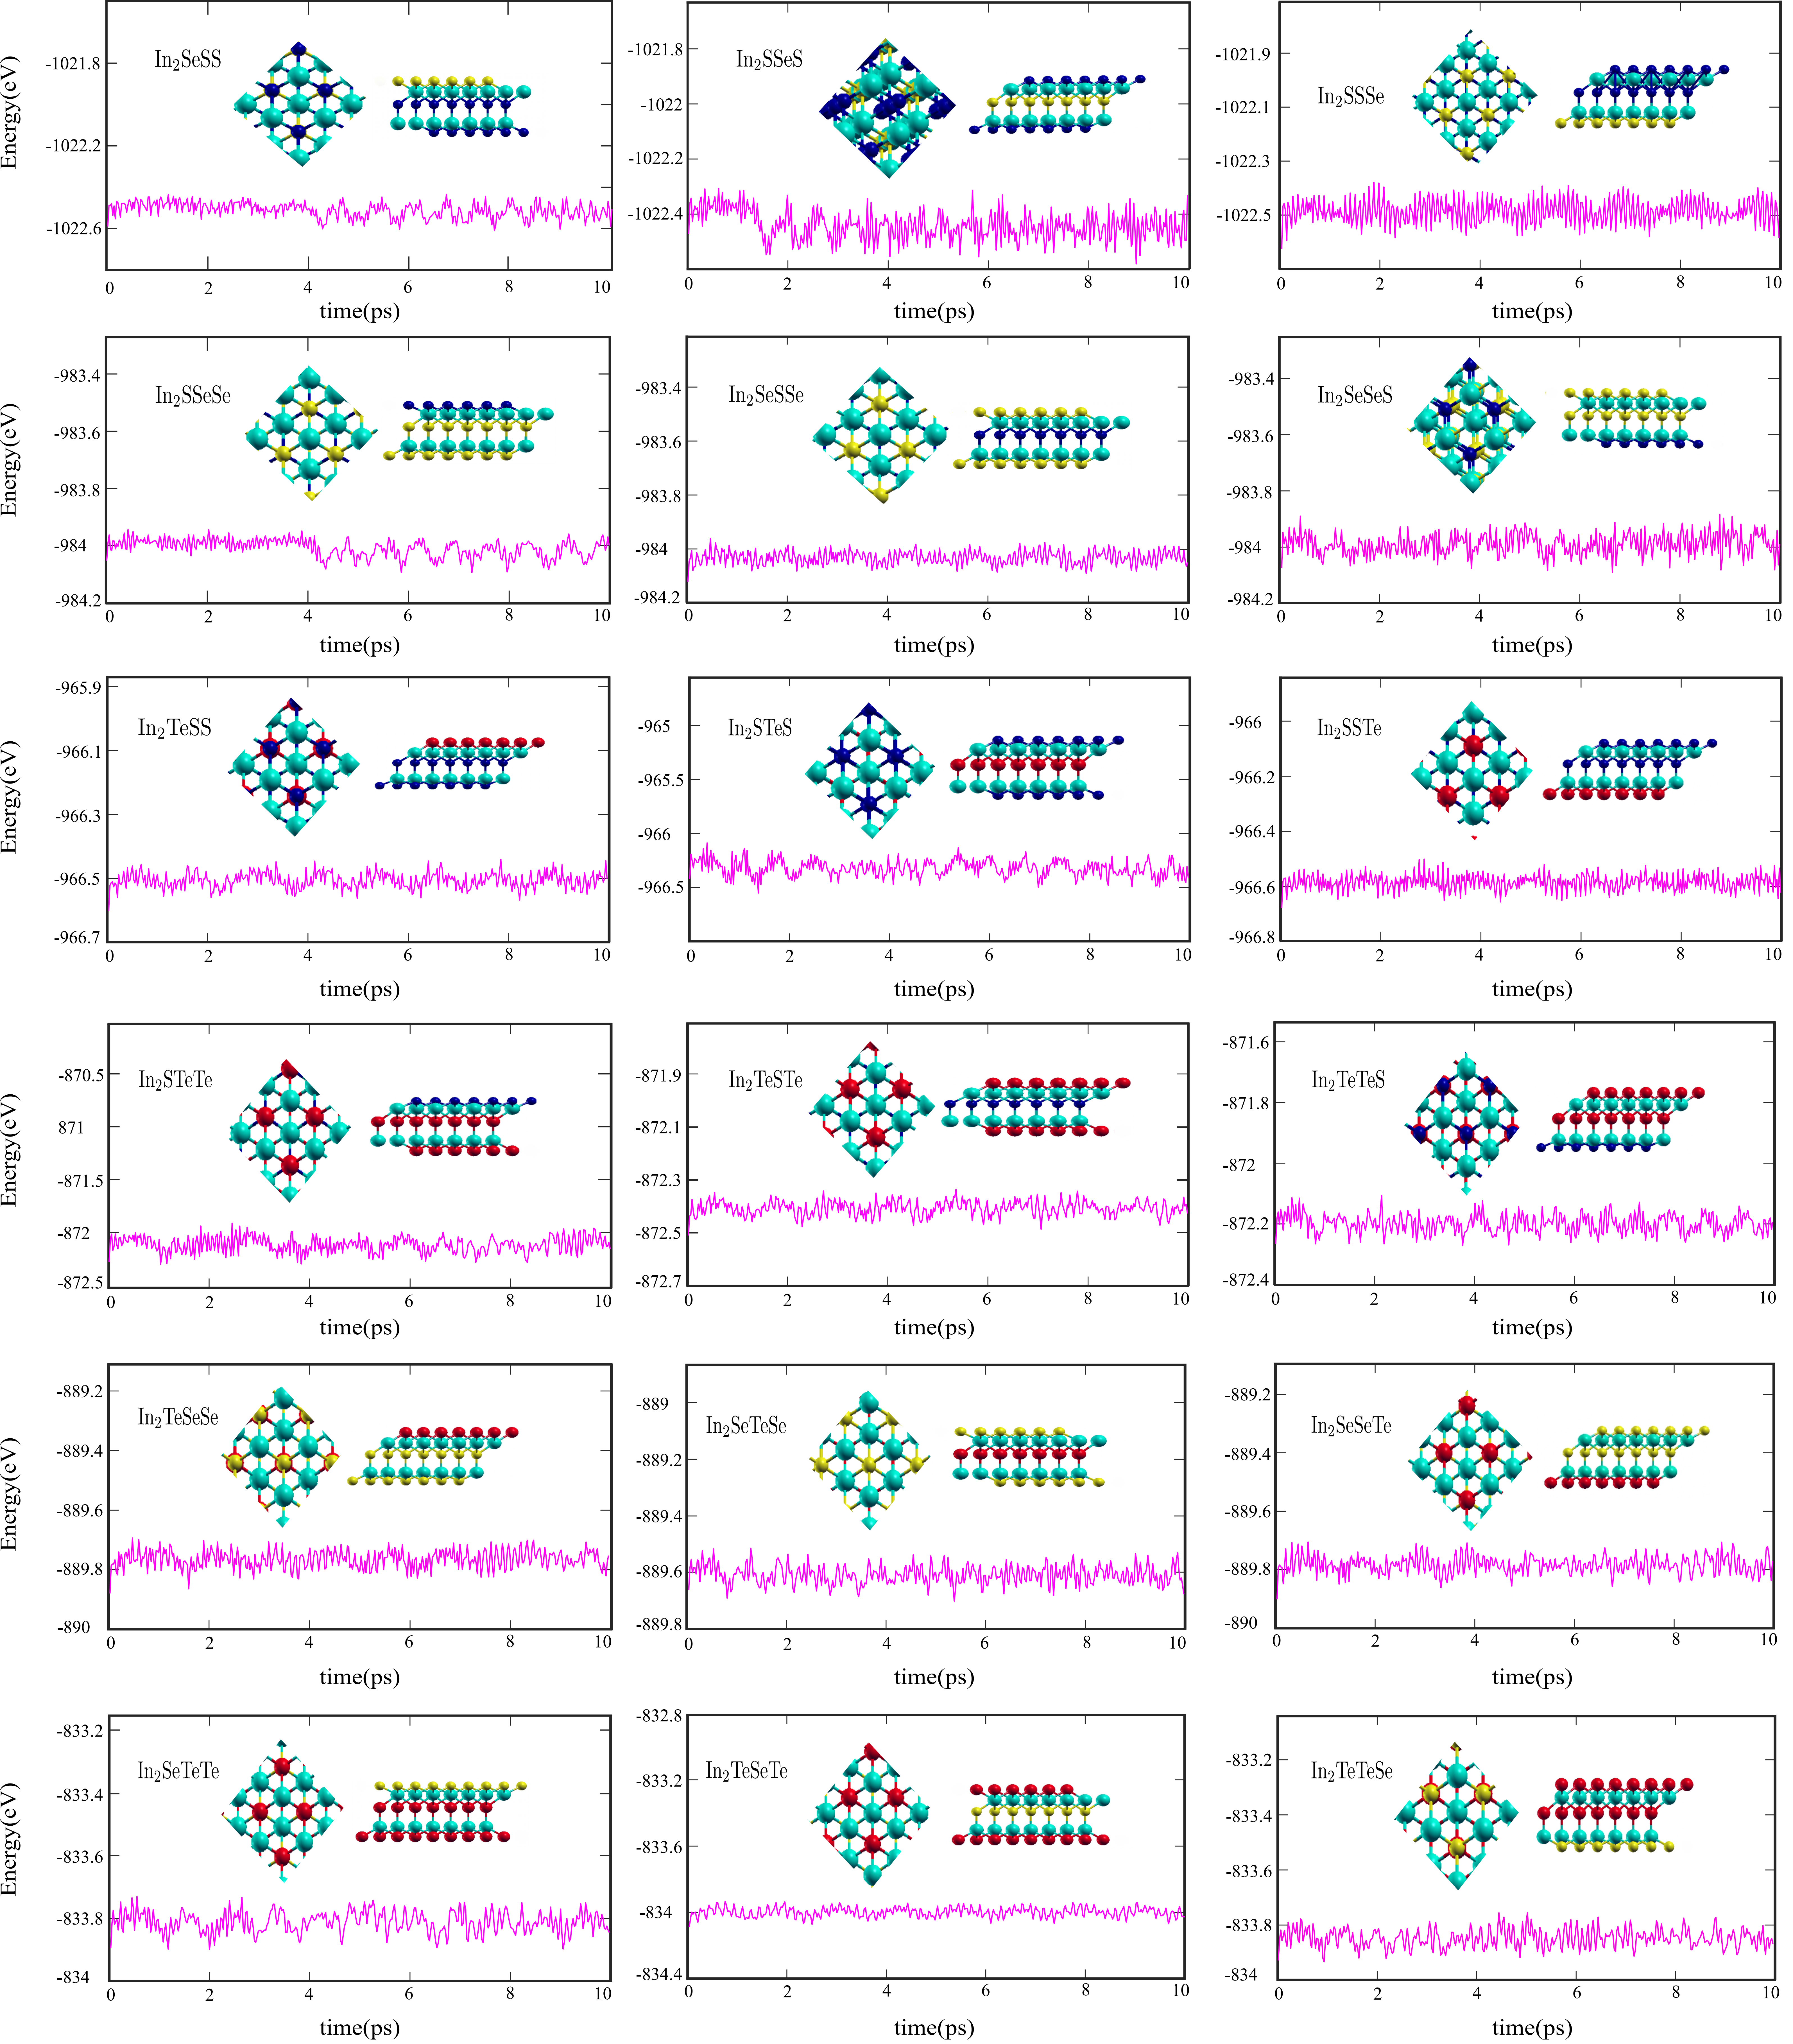

Supplement: d4cp00932k2.zip [file d4cp00932k2.zip]
